# Supplementary material
Source: PubMed Central journal article supplement (PMC3924784)

## Supplemental Figure Legends

### Supplemental Figure 1: Role of the MyD88 and TRIF signaling pathways in NLRP3 activation in response to TLR ligands or Listeria infection.

A-E, graphs showing the densitometric values (arbitrary units) of caspase-1 p20 bands in Figure 1A-E.

F, G, immunoblots of caspase-1 in the culture supernatants (*upper panels*) or cell lysates (*lower panels*) after infection of NLRP3-KO or N1-8 macrophages with Listeria (MOI 100) for different periods of time (F), or infection of the indicated mouse knockout macrophage with Listeria (MOI 100) for 60 min (G).

H, I, confocal images of stable NLRP3-KO cell lines expressing WT NLRP3-GFP (H) or Walker A/B mutant NLRP3-GFP (I), left untreated (Un) or infected with Listeria (Listeria) for 45 min as indicated. The green and blue signals represent NLRP3 and nuclear fluorescence, respectively. Bar: 10  $\mu$ m.

J, immunoblots of caspase-1 in culture supernatants (Sup) or cell lysates (Lys) after stimulation of WT or Walker A/B mutant NLRP3-GFP-expressing macrophages with LPS plus ATP or infection with Listeria (MOI 100) for 45 min as indicated.

### Supplemental Figure 2: TLR signaling through the MyD88-IRAK4-IRAK1 pathway is required for rapid activation and oligomerization of NLRP3.

A, immunoblots of caspase-1 and HMGB1 in the culture supernatants (Sup) or cell lysates (Lys) of mouse macrophages derived from (WT), MyD88-KO, TRIF-KO, IRAK4-KO, IRAK1-KO or TBK1-KO mice, stimulated simultaneously with LPS, Pam3CSK4 (Pam), or Poly I:C plus ATP for 45 min as indicated.

B, confocal images of stable NLRP3-KO cell lines expressing WT NLRP3-GFP left untreated (Un) or treated with PamCSK4 (Pam, 45 min), Poly I:C (Poly, 90 min), PamCSK4 plus nigericin (Pam + Nig, 45 min), Poly I:C for 45 min followed by nigericin for an additional 45 min (Poly45 + Nig) or nigericin alone (Nig, 45 min) as indicated. The green and blue signals represent NLRP3 and nuclear fluorescence, respectively. Bar: 10  $\mu$ m.

C, a graph showing the percentages of cells containing NLRP3 specks after treatments with PamCSK4 (Pam, 45 min), Poly I:C (Poly, 90 min), PamCSK4 plus nigericin (Pam + Nig, 45 min), PamCSK4 for 45 min followed by nigericin for an additional 45 min (Pam45 + Nig), Poly I:C plus nigericin (Poly + Nig, 45 min), Poly I:C for 45 min followed by nigericin for an additional 45 min (Poly45 + Nig) or nigericin alone (Nig, 45 min) as indicated.

D, a graph showing the densitometric values (arbitrary units) of caspase-1 p20 bands in Figure 3A.

E, immunoblots of NLRP3, pro-IL-1 $\beta$  and procaspase-1 in cell lysates of WT macrophages treated with LPS for the indicated periods of time in the absence or presence of actinomycin D (Act D, 0.5  $\mu$ g/ml) as indicated. Note inhibition of NLRP3 and pro-IL-1 $\beta$  upregulation in cells treated with actinomycin D (4<sup>th</sup> and 5<sup>th</sup> lanes).

# Supplemental Figure 1

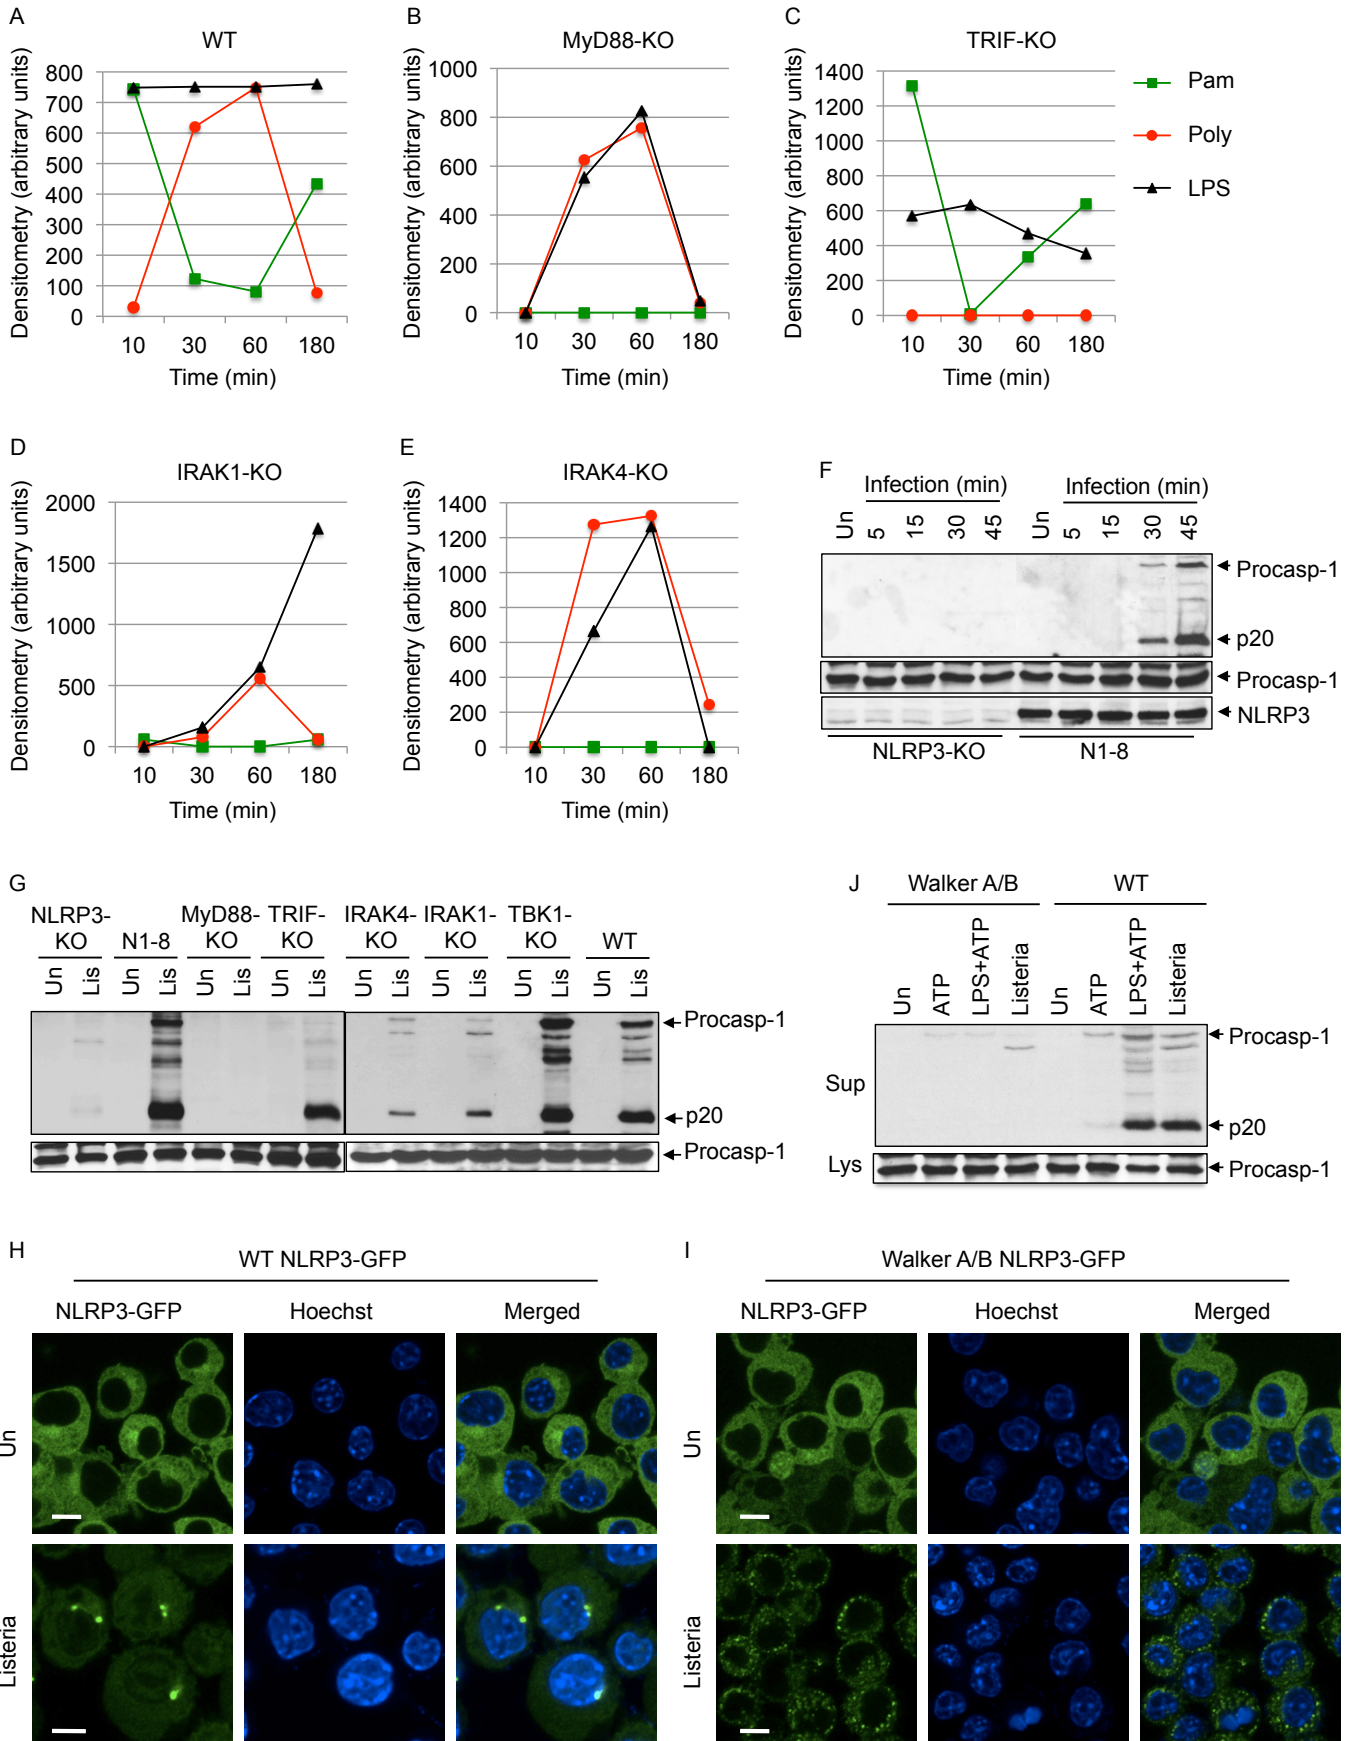

## Supplemental Figure 2

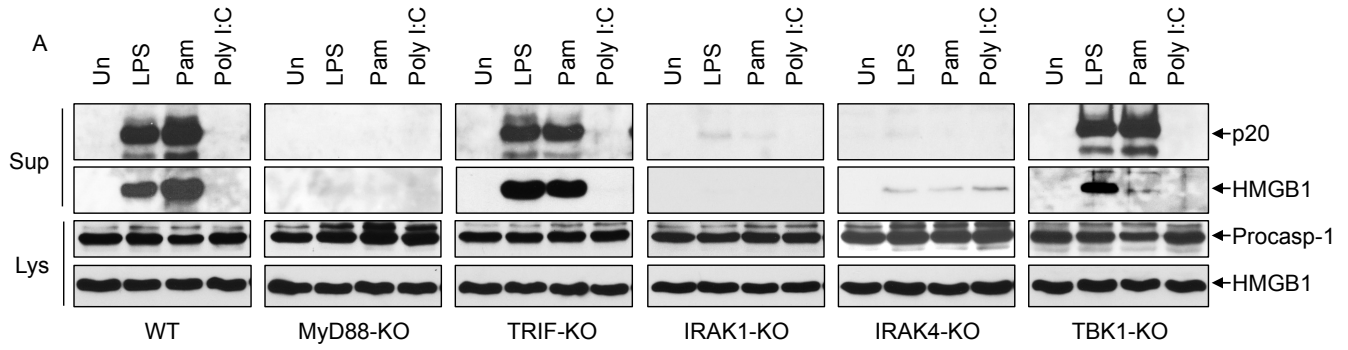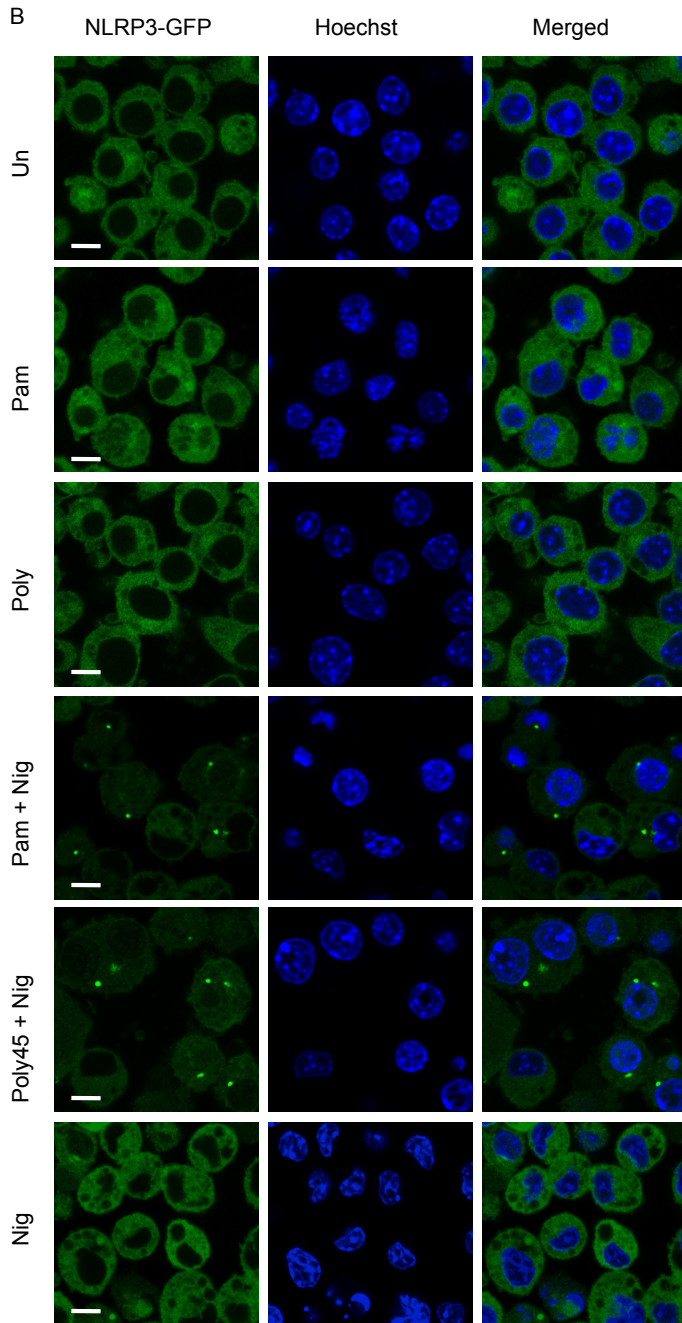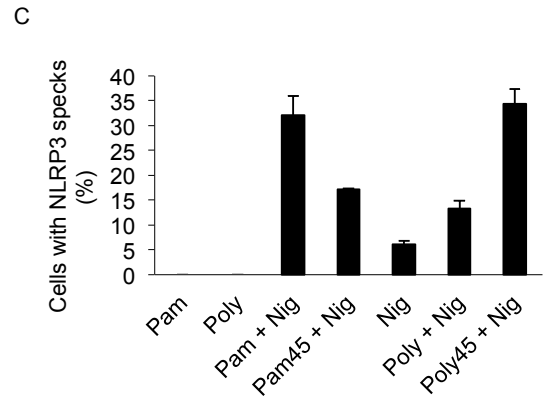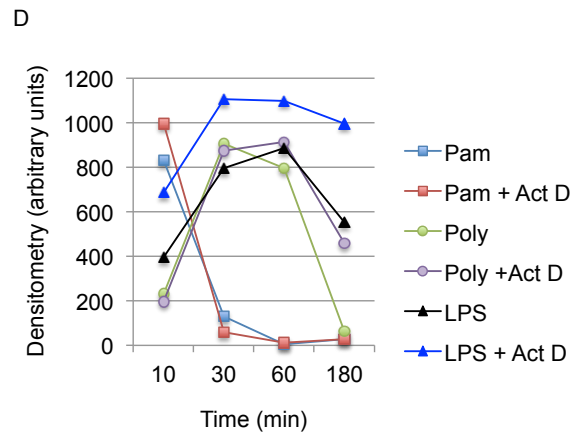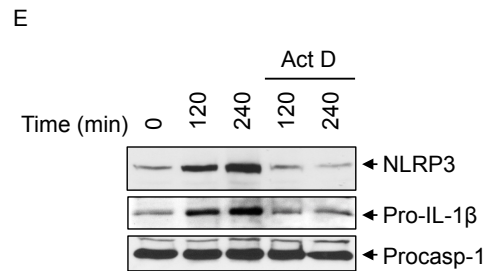

Supplement: NIHMS518715-supplement-Revised_Supplemental_Figures.pdf [file NIHMS518715-supplement-Revised_Supplemental_Figures.pdf]
